# Supplementary material for: Independent re-analysis of alleged mind-matter interaction in double-slit experimental data
Source: PLoS One. 2019 Feb 7;14(2):e0211511. doi: 10.1371/journal.pone.0211511 (PMC6366771; doi:10.1371/journal.pone.0211511)
Supplement: S1 File — (PDF) [file pone.0211511.s001.pdf]

## Supporting information

Let  $0 < \alpha < 1$  be a significance level. We illustrate here that false-positives are uncontrolled in the test used in [1] and under control of  $\alpha$  in the correct test described in Section 2.3. To do so, consider the following framework:

- i/ Create a synthetic set  $\mathcal{X}$  by drawing its  $n$  iid elements from  $\mathcal{N}(0, 1)$ , the Gaussian distribution with zero mean and variance 1.  $n$  is set to  $10^3$ .
- ii/ Generate  $N = 5 \times 10^4$  independent realisations of such set  $\mathcal{X}$ . All  $N$  sets thus have a true zero mean by construction.
- iii/ Test each set: obtain a  $p$ -value per set and, given the significance level  $\alpha$ , a rejection decision per set.

We then consider both the probability of type I error estimated by  $\hat{p}_I = R/N$ , where  $R$  counts the number of rejected sets  $\mathcal{X}$  (for the given  $\alpha$ ), as well as the  $\alpha$ -quantile  $p_\alpha^*$  of the  $N$   $p$ -values obtained: the value under which there are  $\alpha N$   $p$ -values. If the test used in iii/ is correct, both  $\hat{p}_I$  and  $p_\alpha^*$  should be very close to  $\alpha$ .

Figure 13 compares results obtained with the test published in [1] and the one described in Section 2.3. For both tests, at  $q = 0$  and as expected, both indicators  $\hat{p}_I$  and  $p_\alpha^*$  are at  $\alpha$ , as it should be. However, as  $q$  increases, the test from [1] deviates from  $\alpha$  quite significantly. For instance, for  $q = 0.2$ , the 0.01-quantile of the computed  $p$ -values is  $3.5 \times 10^{-4}$ , almost two orders of magnitude lower than what it should be!

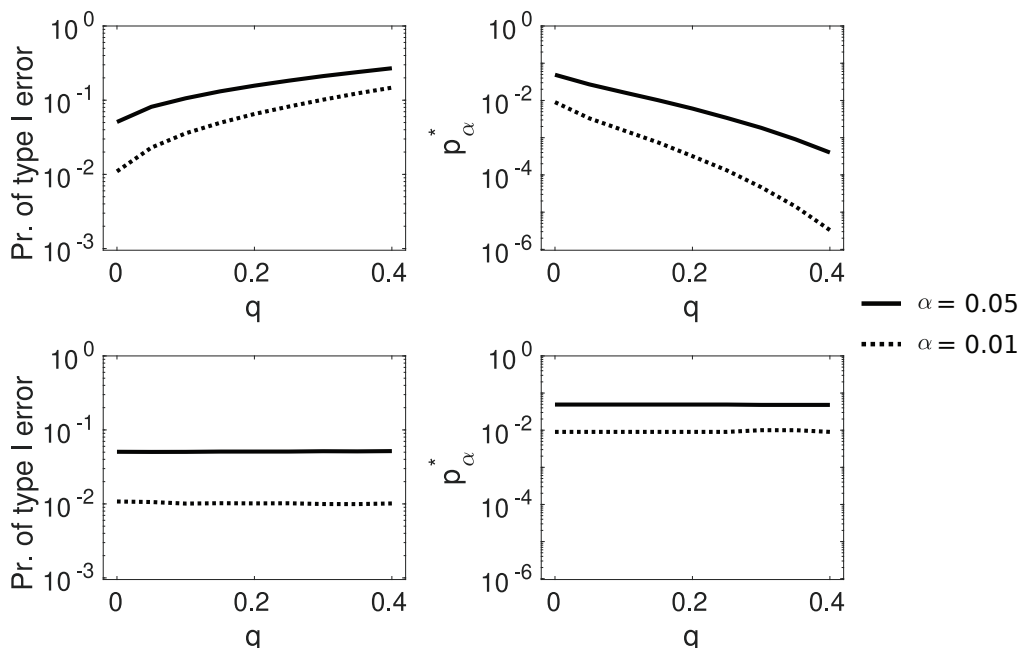

**Fig 13. Results obtained on artificial data of zero mean** (see the Supporting information for details). Top line: results of the test published in [1]. Bottom line: results of the correct test detailed in Section 2.3. Left: the estimated type I error  $\hat{p}_I$  as a function of  $q$  (the trimming intensity), for two different values of  $\alpha$ . Right: the  $\alpha$ -quantiles of the  $p$ -values versus  $q$ , for two different values of  $\alpha$ . Number of bootstrap samples used for both tests: 2000.

On the contrary, in the test used in this paper, and for all values of  $q$ , both  $\hat{p}_I$  and  $p_\alpha^*$  are equal to what is expected from a well-controlled test, namely  $\alpha$ .
